# Supplementary material for: A machine-learning framework to characterize functional disease architectures and prioritize disease variants
Source: Research Square preprint supplement (doi:10.21203/rs.3.rs-7826390/v1), 2025-11-12
Supplement: Supplementary file 1 [file 035e9bfa0155c394ffb07f18.xlsx]

## Sheet: S1
Table S1: List of the 15 UK Biobank independent GWAS. These 15 traits correspond to the 16 independent traits from Weissbrod et al. 2020 Nat Genet, from which we removed hair color because of low polygenicity.
Trait name	Trait ID	GWAS sample size (N)
Cholesterol	biochemistry_Cholesterol	319755
High Light Scatter Retic. Count	blood_HIGH_LIGHT_SCATTER_RETICULOCYTE_COUNT	321608
Mean Corpuscular Hemoglobin	blood_MEAN_CORPUSCULAR_HEMOGLOBIN	326188
Mean Platelet Volume	blood_MEAN_PLATELET_VOL	327205
Monocyte Count	blood_MONOCYTE_COUNT	325319
Bone Mineral Density	bmd_HEEL_TSCOREz	327738
Balding Type 1	body_BALDING1	155100
Height	body_HEIGHTz	336759
Diastolic blood pressure	bp_DIASTOLICadjMEDz	310831
Allergy Eczema Diagnosed	disease_ALLERGY_ECZEMA_DIAGNOSED	337071
FEV1/FVC Ratio	lung_FEV1FVCzSMOKE	274172
Forced Vital Capacity	lung_FVCzSMOKE	274172
Chronotype (morning person)	other_MORNINGPERSON	301397
Age of Menarche	repro_MENARCHE_AGE	176155
#Children	repro_NumberChildrenEverBorn_Pooled	335600

## Sheet: S2
Table S2: List of the 187 functional and evolutionary annotations from our baseline-LF models. We report the 187 annotations of the baseline-LF model. They include 96 annotations for common variants (identical annotations from the baseline-LD model) and 91 annotations for low-frequency variants. We highlight 40 main common annotations used in Fig. 2 and Fig. 3.
Annotation	40 main annotation
Coding_UCSC_lowfreq	no
Coding_UCSC_common	yes
Coding_UCSC.flanking.500_lowfreq	no
Coding_UCSC.flanking.500_common	no
Conserved_LindbladToh_lowfreq	no
Conserved_LindbladToh_common	yes
Conserved_LindbladToh.flanking.500_lowfreq	no
Conserved_LindbladToh.flanking.500_common	no
CTCF_Hoffman_lowfreq	no
CTCF_Hoffman_common	yes
CTCF_Hoffman.flanking.500_lowfreq	no
CTCF_Hoffman.flanking.500_common	no
DGF_ENCODE_lowfreq	no
DGF_ENCODE_common	yes
DGF_ENCODE.flanking.500_lowfreq	no
DGF_ENCODE.flanking.500_common	no
DHS_peaks_Trynka_lowfreq	no
DHS_peaks_Trynka_common	yes
DHS_Trynka_lowfreq	no
DHS_Trynka_common	yes
DHS_Trynka.flanking.500_lowfreq	no
DHS_Trynka.flanking.500_common	no
Enhancer_Andersson_lowfreq	no
Enhancer_Andersson_common	yes
Enhancer_Andersson.flanking.500_lowfreq	no
Enhancer_Andersson.flanking.500_common	no
Enhancer_Hoffman_lowfreq	no
Enhancer_Hoffman_common	yes
Enhancer_Hoffman.flanking.500_lowfreq	no
Enhancer_Hoffman.flanking.500_common	no
FetalDHS_Trynka_lowfreq	no
FetalDHS_Trynka_common	yes
FetalDHS_Trynka.flanking.500_lowfreq	no
FetalDHS_Trynka.flanking.500_common	no
H3K27ac_Hnisz_lowfreq	no
H3K27ac_Hnisz_common	yes
H3K27ac_Hnisz.flanking.500_lowfreq	no
H3K27ac_Hnisz.flanking.500_common	no
H3K27ac_PGC2_lowfreq	no
H3K27ac_PGC2_common	yes
H3K27ac_PGC2.flanking.500_lowfreq	no
H3K27ac_PGC2.flanking.500_common	no
H3K4me1_peaks_Trynka_lowfreq	no
H3K4me1_peaks_Trynka_common	yes
H3K4me1_Trynka_lowfreq	no
H3K4me1_Trynka_common	yes
H3K4me1_Trynka.flanking.500_lowfreq	no
H3K4me1_Trynka.flanking.500_common	no
H3K4me3_peaks_Trynka_lowfreq	no
H3K4me3_peaks_Trynka_common	yes
H3K4me3_Trynka_lowfreq	no
H3K4me3_Trynka_common	yes
H3K4me3_Trynka.flanking.500_lowfreq	no
H3K4me3_Trynka.flanking.500_common	no
H3K9ac_peaks_Trynka_lowfreq	no
H3K9ac_peaks_Trynka_common	yes
H3K9ac_Trynka_lowfreq	no
H3K9ac_Trynka_common	yes
H3K9ac_Trynka.flanking.500_lowfreq	no
H3K9ac_Trynka.flanking.500_common	no
Intron_UCSC_lowfreq	no
Intron_UCSC_common	yes
Intron_UCSC.flanking.500_lowfreq	no
Intron_UCSC.flanking.500_common	no
PromoterFlanking_Hoffman_lowfreq	no
PromoterFlanking_Hoffman_common	yes
PromoterFlanking_Hoffman.flanking.500_lowfreq	no
PromoterFlanking_Hoffman.flanking.500_common	no
Promoter_UCSC_lowfreq	no
Promoter_UCSC_common	yes
Promoter_UCSC.flanking.500_lowfreq	no
Promoter_UCSC.flanking.500_common	no
Repressed_Hoffman_lowfreq	no
Repressed_Hoffman_common	yes
Repressed_Hoffman.flanking.500_lowfreq	no
Repressed_Hoffman.flanking.500_common	no
SuperEnhancer_Hnisz_lowfreq	no
SuperEnhancer_Hnisz_common	yes
SuperEnhancer_Hnisz.flanking.500_lowfreq	no
SuperEnhancer_Hnisz.flanking.500_common	no
TFBS_ENCODE_lowfreq	no
TFBS_ENCODE_common	yes
TFBS_ENCODE.flanking.500_lowfreq	no
TFBS_ENCODE.flanking.500_common	no
Transcr_Hoffman_lowfreq	no
Transcr_Hoffman_common	yes
Transcr_Hoffman.flanking.500_lowfreq	no
Transcr_Hoffman.flanking.500_common	no
TSS_Hoffman_lowfreq	no
TSS_Hoffman_common	yes
TSS_Hoffman.flanking.500_lowfreq	no
TSS_Hoffman.flanking.500_common	no
UTR_3_UCSC_lowfreq	no
UTR_3_UCSC_common	yes
UTR_3_UCSC.flanking.500_lowfreq	no
UTR_3_UCSC.flanking.500_common	no
UTR_5_UCSC_lowfreq	no
UTR_5_UCSC_common	yes
UTR_5_UCSC.flanking.500_lowfreq	no
UTR_5_UCSC.flanking.500_common	no
WeakEnhancer_Hoffman_lowfreq	no
WeakEnhancer_Hoffman_common	yes
WeakEnhancer_Hoffman.flanking.500_lowfreq	no
WeakEnhancer_Hoffman.flanking.500_common	no
GERP.NS_lowfreq	no
GERP.NS_common	no
GERP.RSsup4_lowfreq	no
GERP.RSsup4_common	yes
MAFbin_lowfreq_1	no
MAFbin_lowfreq_2	no
MAFbin_lowfreq_3	no
MAFbin_lowfreq_4	no
MAFbin_lowfreq_5	no
MAFbin_lowfreq_6	no
MAFbin_lowfreq_7	no
MAFbin_lowfreq_8	no
MAFbin_lowfreq_9	no
MAFbin_lowfreq_10	no
MAFbin_frequent_1	no
MAFbin_frequent_2	no
MAFbin_frequent_3	no
MAFbin_frequent_4	no
MAFbin_frequent_5	no
MAFbin_frequent_6	no
MAFbin_frequent_7	no
MAFbin_frequent_8	no
MAFbin_frequent_9	no
MAFbin_frequent_10	no
MAF_Adj_Predicted_Allele_Age_common	no
MAF_Adj_LLD_AFR_lowfreq	no
MAF_Adj_LLD_AFR_common	no
Recomb_Rate_10kb_lowfreq	no
Recomb_Rate_10kb_common	no
Nucleotide_Diversity_10kb_lowfreq	no
Nucleotide_Diversity_10kb_common	no
Backgrd_Selection_Stat_lowfreq	no
Backgrd_Selection_Stat_common	no
CpG_Content_50kb_lowfreq	no
CpG_Content_50kb_common	no
MAF_Adj_ASMC_lowfreq	no
MAF_Adj_ASMC_common	no
GTEx_eQTL_MaxCPP_common	no
BLUEPRINT_H3K27acQTL_MaxCPP_common	no
BLUEPRINT_H3K4me1QTL_MaxCPP_common	no
BLUEPRINT_DNA_methylation_MaxCPP_common	no
synonymous_lowfreq	no
synonymous_common	yes
non_synonymous_lowfreq	no
non_synonymous_common	yes
Conserved_Vertebrate_phastCons46way_lowfreq	no
Conserved_Vertebrate_phastCons46way_common	yes
Conserved_Vertebrate_phastCons46way.flanking.500_lowfreq	no
Conserved_Vertebrate_phastCons46way.flanking.500_common	no
Conserved_Mammal_phastCons46way_lowfreq	no
Conserved_Mammal_phastCons46way_common	yes
Conserved_Mammal_phastCons46way.flanking.500_lowfreq	no
Conserved_Mammal_phastCons46way.flanking.500_common	no
Conserved_Primate_phastCons46way_lowfreq	no
Conserved_Primate_phastCons46way_common	yes
Conserved_Primate_phastCons46way.flanking.500_lowfreq	no
Conserved_Primate_phastCons46way.flanking.500_common	no
BivFlnk_lowfreq	no
BivFlnk_common	yes
BivFlnk.flanking.500_lowfreq	no
BivFlnk.flanking.500_common	no
Human_Promoter_Villar_lowfreq	no
Human_Promoter_Villar_common	yes
Human_Promoter_Villar.flanking.500_lowfreq	no
Human_Promoter_Villar.flanking.500_common	no
Human_Enhancer_Villar_lowfreq	no
Human_Enhancer_Villar_common	yes
Human_Enhancer_Villar.flanking.500_lowfreq	no
Human_Enhancer_Villar.flanking.500_common	no
Ancient_Sequence_Age_Human_Promoter_lowfreq	no
Ancient_Sequence_Age_Human_Promoter_common	yes
Ancient_Sequence_Age_Human_Promoter.flanking.500_lowfreq	no
Ancient_Sequence_Age_Human_Promoter.flanking.500_common	no
Ancient_Sequence_Age_Human_Enhancer_lowfreq	no
Ancient_Sequence_Age_Human_Enhancer_common	yes
Ancient_Sequence_Age_Human_Enhancer.flanking.500_lowfreq	no
Ancient_Sequence_Age_Human_Enhancer.flanking.500_common	no
Human_Enhancer_Villar_Species_Enhancer_Count_lowfreq	no
Human_Enhancer_Villar_Species_Enhancer_Count_common	no
Human_Promoter_Villar_ExAC_lowfreq	no
Human_Promoter_Villar_ExAC_common	yes
Human_Promoter_Villar_ExAC.flanking.500_lowfreq	no
Human_Promoter_Villar_ExAC.flanking.500_common	no

## Sheet: S3
Table S3: List of the 79 independent European GWAS not correlated with the 15 UK Biobank traits. We report the set of 79 independent European GWAS constructed by removing from the 107 independent traits from ref. 34 the traits that were genetically correlated to the 15 UK Biobank GWAS.
TRAIT ID	Trait name	Reference	GWAS sample size (N)
PASS.Schizophrenia.Trubetskoy2022	Schizophrenia	https://www.nature.com/articles/s41586-022-04434-5#Abs1	130664
PASS.Depression.Howard2019	Depression	https://www.nature.com/articles/s41593-018-0326-7#data-availability	500199
PASS.Bipolar_Disorder_ALL.Mullins2021	Bipolar disorder (all cases)	https://www.nature.com/articles/s41588-021-00857-4	405675
PASS.Knee_Osteoarthritis.Boer2021	Knee Osteoarthritis	https://pubmed.ncbi.nlm.nih.gov/34450027/	399321
PASS.Atrial_Fibrillation.Nielsen2018	Atrial Fibrillation	https://www.nature.com/articles/s41588-018-0171-3	1030840
PASS.Glaucoma.Craig2020	Glaucoma	https://www.nature.com/articles/s41588-019-0556-y	67040
PASS.Insomnia.Watanabe2022	Insomnia	https://www.nature.com/articles/s41588-022-01124-w	608594
PASS.Coronary_Artery_Disease.Aragam2022	Coronary Artery Disease (Aragam)	https://www.nature.com/articles/s41588-022-01233-6	1322480
UKB_460K.disease_HYPOTHYROIDISM_SELF_REP	Hypothyroidism (Self reported)	Price lab summary statistics (https://www.nature.com/articles/s41588-018-0144-6)	459324
PASS.Multiple_Sclerosis.IMSGC2019	Multiple Sclerosis	https://www.science.org/doi/10.1126/science.aav7188	115803
PASS.Gastrointestinal_Disease.Donertas2021	Gastrointestinal Disease	https://pmc.ncbi.nlm.nih.gov/articles/PMC7610725/	484598
PASS.Total_Hip_Replacement.Boer2021	Total Hip Replacement	https://www.cell.com/cell/fulltext/S0092-8674(21)00941-7?_returnURL=https%3A%2F%2Flinkinghub.elsevier.com%2Fretrieve%2Fpii%2FS0092867421009417%3Fshowall%3Dtrue	317466
PANUKBB.Diverticulosis_And_Diverticulitis	Diverticulosis and Diverticulitis	https://www.medrxiv.org/content/10.1101/2024.03.13.24303864v2	365887
PASS.Inflammatory_Bowel_Disease.deLange2017	IBD	https://www.nature.com/articles/ng.3760	59957
PANUKBB.Varicose_Vein_Surgery	Varicose Vein Surgery	https://www.medrxiv.org/content/10.1101/2024.03.13.24303864v2	420473
PASS.Rheumatoid_Arthritis.Ishigaki2022	Rheumatoid Arthritis (Ishigaki)	https://www.nature.com/articles/s41588-022-01213-w#data-availability	97173
PASS.Rheumatoid_Arthritis.Saevarsdottir2022	Rheumatoid Arthritis (Saevarsdottir)	https://ard.bmj.com/content/81/8/1085.long	1026690
PASS.Anorexia_Nervosa.Watson2019	Anorexia nervosa	https://www.nature.com/articles/s41588-019-0439-2	70157
PASS.Cancer_Prostate.Schumacher2018	Prostate Cancer	https://www.nature.com/articles/s41588-018-0142-8	74849
PASS.Heart_Failure.Shah2020	Heart Failure	https://pubmed.ncbi.nlm.nih.gov/31919418/	964057
GBMI.Primary_Apen_Angle_Glaucoma	Primary open-angle glaucoma	https://www.sciencedirect.com/science/article/pii/S2666979X2200204X?via%3Dihub	1144540
PANUKBB.Atrial_Fibrillation_And_Flutter	Atrial Fibrillation And Flutter	https://pan.ukbb.broadinstitute.org	403890
PASS.Varicose_Veins.Ahmed2022	Varicose veins	https://www.nature.com/articles/s41467-022-30765-y	401656
PANUKBB.Mouth_Teeth_Dental_Problems	Mouth and Dental Problems	https://www.medrxiv.org/content/10.1101/2024.03.13.24303864v2	418978
PASS.Alzheimers_Disease.Wightman2021	Alzheimer's Disease	https://pubmed.ncbi.nlm.nih.gov/34493870/	1126563
PANUKBB.Inguinal_Hernia	Inguinal Hernia	https://pan.ukbb.broadinstitute.org	382422
PASS.Endometriosis.Rahmioglu2023	Endometriosis	https://pubmed.ncbi.nlm.nih.gov/36914876/	477454
PASS.Acne_Vulgaris.TederLaving2023	Acne vulgaris	https://www.nature.com/articles/s41431-023-01326-8	399413
PASS.Genetic_Generalized_Epilepsy.Berkovic2022	GGE	https://www.medrxiv.org/content/10.1101/2022.06.08.22276120v1.full	23259
PASS.Ischemic_Stroke.Malik2018	Ischemic Stroke	https://pmc.ncbi.nlm.nih.gov/articles/PMC5968830/	440328
GBMI.Abdominal_Aortic_Aneurysm	Abdominal Aortic Aneurysm	https://pubmed.ncbi.nlm.nih.gov/36777996/	1235988
PASS.Parkinson.Nalls2019	Parkinson's Disease	https://pmc.ncbi.nlm.nih.gov/articles/PMC8422160/	450228
PASS.Type_1_Diabetes.Chiou2021	T1D - Type 1 Diabetes	https://www.nature.com/articles/s41586-021-03552-w#data-availability	511737
PASS.Venous_Thromboembolism.Ghouse2023	Venous Thromboembolism	https://pubmed.ncbi.nlm.nih.gov/36658437/	1500860
PASS.Cancer_Lung.McKay2017	Lung Cancer	https://pubmed.ncbi.nlm.nih.gov/28604730/	85716
PANUKBB.Breast_Cancer_female	Breast Cancer (Female)	https://www.medrxiv.org/content/10.1101/2024.03.13.24303864v2	219170
UKB_460K.cancer_PROSTATE	Prostate Cancer	Price lab summary statistics (https://www.nature.com/articles/s41588-018-0144-6)	459324
GBMI.Acute_Appendicitis	Acute Appendicitis	https://pubmed.ncbi.nlm.nih.gov/36777996/	982641
PASS.Gout.Donertas2021	Gout	https://pubmed.ncbi.nlm.nih.gov/33959723/	484598
PANUKBB.C44_Other_Malignant_Neoplasms_Of_Skin	Other Malignant Neoplasms of Skin	https://www.medrxiv.org/content/10.1101/2024.03.13.24303864v2	420531
PASS.Cancer_Esophageal.Gharahkhani2016	Esophageal Cancer	https://pubmed.ncbi.nlm.nih.gov/27527254/	21271
PASS.Thumb_Osteoarthritis.Boer2021	Thumb Osteoarthritis	https://pubmed.ncbi.nlm.nih.gov/34450027/	247230
PASS.Autism.PGC2013	Autism Spectrum Disorder	https://pubmed.ncbi.nlm.nih.gov/23453885/	10263
PASS.Tourette_Syndrome.Yu2019	Tourette Syndrome	https://pubmed.ncbi.nlm.nih.gov/30818990/	14307
PASS.Primary_Biliary_Cirrhosis.Cordell2015	Primary Biliary Cirrhosis	https://www.nature.com/articles/ncomms9019	13239
PASS.Covid19_Infection.hg_v7	COVID-19 Infection	https://www.covid19hg.org/results/r7/	2520917
PASS.Lupus.Bentham2015	Lupus (SLE)	https://www.nature.com/articles/ng.3434	14267
PASS.Celiac.Dubois2010	Celiac disease	https://www.nature.com/articles/ng.543	15283
PASS.Forced_Vital_Capacity.Shrine2023	COPD - FVC	https://www.nature.com/articles/s41588-023-01314-0#data-availability	580505
PASS.Intelligence.SavageJansen2018	Intelligence	https://www.nature.com/articles/s41588-018-0152-6	264193
PASS.Daytime_Napping.Dashti2021	Daytime napping	https://www.nature.com/articles/s41467-020-20585-3#data-availability	452633
UKB_460K.biochemistry_TotalProtein	Total Protein	Price lab summary statistics (https://www.nature.com/articles/s41588-018-0144-6)	397652
UKB_460K.body_WHRadjBMIz	WHR BMI ratio	Price lab summary statistics (https://www.nature.com/articles/s41588-018-0144-6)	458417
PASS.Reaction_Time.Davies2018	Reaction Time	https://www.nature.com/articles/s41467-018-04362-x	300486
UKB_460K.biochemistry_Creatinine	Creatinine	Price lab summary statistics (https://www.nature.com/articles/s41588-018-0144-6)	434158
PASS.Snoring.Campos2020	Snoring	https://www.nature.com/articles/s41467-020-14625-1#Abs1	408317
PASS.Sleep_Duration.Dashti2019	Sleep Duration	https://www.nature.com/articles/s41467-019-08917-4	446118
PASS.Eosinophil_Percentage.Vuckovic2020	Eosinophil Percentage	https://www.cell.com/cell/fulltext/S0092-8674(20)30999-5?_returnURL=https%3A%2F%2Flinkinghub.elsevier.com%2Fretrieve%2Fpii%2FS0092867420309995%3Fshowall%3Dtrue	408112
UKB_460K.biochemistry_IGF1	Insulin-like Growth Factor 1 (IGF-1) Levels	Price lab summary statistics (https://www.nature.com/articles/s41588-018-0144-6)	432292
PASS.General_Risk_Tolerance.KarlssonLinner2019	General Risk Tolerance	https://www.nature.com/articles/s41588-018-0309-3	466570
UKB_460K.biochemistry_AspartateAminotransferase	Aspartate Aminotransferase	Price lab summary statistics (https://www.nature.com/articles/s41588-018-0144-6)	430982
UKB_460K.biochemistry_Testosterone_Male	Testosterone Male	Price lab summary statistics (https://www.nature.com/articles/s41588-018-0144-6)	196813
PASS.Physical_Activity.Wang2022	Physical Activity	https://pubmed.ncbi.nlm.nih.gov/36071172/	589564
UKB_460K.biochemistry_AlkalinePhosphatase	Alkaline Phosphatase	Price lab summary statistics (https://www.nature.com/articles/s41588-018-0144-6)	433862
PASS.Drinks_Per_Week.Liu2019	Drinks Per Week	https://www.nature.com/articles/s41588-018-0307-5	527298
UKB_460K.biochemistry_Phosphate	Serum Phosphate Levels	Price lab summary statistics (https://www.nature.com/articles/s41588-018-0144-6)	397561
UKB_460K.biochemistry_VitaminD	Vitamin D Levels	Price lab summary statistics (https://www.nature.com/articles/s41588-018-0144-6)	415700
PASS.Alcohol_use.SanchezRoige2018	Alcohol Use	https://pubmed.ncbi.nlm.nih.gov/30336701/	120387
UKB_460K.biochemistry_TotalBilirubin	Total Bilirubin Levels	Price lab summary statistics (https://www.nature.com/articles/s41588-018-0144-6)	429423
PASS.Covid19_Vaccination.Hartonen2023	COVID-19 Vaccination Response	https://pubmed.ncbi.nlm.nih.gov/37081098/	273765
UKB_460K.pigment_SUNBURN	Sunburn Susceptibility	Price lab summary statistics (https://www.nature.com/articles/s41588-018-0144-6)	344229
PASS.Basophil_Percentage.Vuckovic2020	Basophil Percentage	https://www.cell.com/cell/fulltext/S0092-8674(20)30999-5?_returnURL=https%3A%2F%2Flinkinghub.elsevier.com%2Fretrieve%2Fpii%2FS0092867420309995%3Fshowall%3Dtrue	408112
PASS.Education_Years.Rietveld2013	Education Years	https://www.science.org/doi/10.1126/science.1235488?url_ver=Z39.88-2003&rfr_id=ori:rid:crossref.org&rfr_dat=cr_pub%20%200pubmed	126559
PASS.Cigarettes_Per_Day.Liu2019	Cigarettes Smoked Per Day	https://pubmed.ncbi.nlm.nih.gov/31387065/	257073
PASS.Cannabis_Use_Disorder.Johnson2020	Cannabis Use Disorder	https://pubmed.ncbi.nlm.nih.gov/33096046/	359934
PASS.Telomere_Length.Codd2021	Telomere Length	https://www.nature.com/articles/s41588-021-00944-6	472174
PASS.Ever_Smoked.TAGC2010	Ever Smoked	https://pmc.ncbi.nlm.nih.gov/articles/PMC2914600/	74035
PASS.Structural_Connectivity_Global.Tissink2023	Global Structural Brain Connectivity	https://www.eneuro.org/content/10/4/ENEURO.0242-22.2023	22720
PASS.CHIP.Kessler2022	Clonal Hematopoiesis of Indeterminate Potential (CHIP)	https://pubmed.ncbi.nlm.nih.gov/36450978/	367836

## Sheet: S4
Table S4: Results of the simulations under the baseline-LD model. We report true and estimated heritability functional enrichments for 40 representative functional annotations of the baseline-LD model.
	h2=0.5					h2=0.1					h2=0.05
	Truth	SuSiE-noprior	SuSiE-noprior s.e.	SuSiE-prior	SuSiE-prior s.e.	Truth	SuSiE-noprior	SuSiE-noprior s.e.	SuSiE-prior	SuSiE-prior s.e.	Truth	SuSiE-noprior	SuSiE-noprior s.e.	SuSiE-prior	SuSiE-prior s.e.
Coding_UCSC_common	4.42582	4.2563	0.0577657	4.46003	0.0588413	4.43552	3.6394	0.079662	4.61712	0.0797078	4.42848	2.93318	0.0926146	4.69103	0.0999032
Conserved_LindbladToh_common	7.46625	7.20066	0.0702706	7.65332	0.0692509	7.46341	5.85054	0.0918602	8.15061	0.0907898	7.47252	4.49571	0.0986301	8.28965	0.106783
CTCF_Hoffman_common	1.00513	1.03236	0.0220617	1.03537	0.0219412	1.00551	1.08065	0.0325714	1.09463	0.0313919	1.00459	1.16342	0.0438385	1.17914	0.0407876
DGF_ENCODE_common	2.34051	2.29526	0.0125063	2.35924	0.0123627	2.34162	2.06885	0.0180061	2.38761	0.0172639	2.34016	1.82777	0.0221854	2.40848	0.0196835
DHS_peaks_Trynka_common	2.60521	2.54513	0.0140543	2.63046	0.0135152	2.60953	2.25712	0.0213173	2.69504	0.0206758	2.60386	1.97844	0.0255594	2.74553	0.0245281
DHS_Trynka_common	2.10648	2.07125	0.01071	2.13164	0.0104803	2.10853	1.86985	0.0144311	2.17301	0.0140716	2.10518	1.68174	0.0183624	2.20245	0.0187774
Enhancer_Andersson_common	3.33795	3.22785	0.115778	3.29639	0.110066	3.33702	2.60247	0.150198	3.2503	0.14169	3.32339	2.37826	0.182556	3.3119	0.195542
Enhancer_Hoffman_common	2.45486	2.38017	0.025394	2.43702	0.0248424	2.45373	2.20008	0.0348265	2.49591	0.035096	2.45413	1.98826	0.0436323	2.53441	0.0440404
FetalDHS_Trynka_common	2.74424	2.69535	0.0188786	2.78642	0.0183057	2.74295	2.37081	0.0283731	2.86392	0.0284893	2.74417	2.09641	0.0324119	2.96665	0.0370115
H3K27ac_Hnisz_common	1.45959	1.45321	0.0047242	1.46131	0.00468559	1.45911	1.41888	0.00661117	1.46841	0.00645627	1.45945	1.37225	0.00832083	1.47666	0.00718748
H3K27ac_PGC2_common	1.70604	1.69102	0.00665068	1.71222	0.00641317	1.70612	1.60989	0.00913727	1.72801	0.00917712	1.70565	1.51745	0.0112656	1.74649	0.00949442
H3K4me1_peaks_Trynka_common	1.96964	1.93764	0.0106905	1.97613	0.0103614	1.97127	1.81556	0.0151807	2.00392	0.014763	1.97125	1.65809	0.0176899	2.00834	0.0173564
H3K4me1_Trynka_common	1.55553	1.53982	0.00410632	1.55669	0.00382115	1.55584	1.46991	0.00577956	1.56747	0.00505345	1.55548	1.38184	0.00690144	1.56506	0.00642186
H3K4me3_peaks_Trynka_common	2.53478	2.4832	0.0269736	2.54731	0.0281694	2.53842	2.2566	0.0393502	2.59727	0.0371346	2.53522	2.04935	0.0501593	2.657	0.0474513
H3K4me3_Trynka_common	2.2963	2.25668	0.0115116	2.3076	0.0117949	2.29822	2.09114	0.0156324	2.36385	0.0174432	2.29612	1.90042	0.0241359	2.39721	0.0216215
H3K9ac_peaks_Trynka_common	2.89731	2.80978	0.0331905	2.89285	0.0313367	2.89921	2.5366	0.0450144	2.95586	0.0435662	2.89762	2.26423	0.0557656	3.00041	0.0496125
H3K9ac_Trynka_common	2.52305	2.46133	0.0132041	2.52193	0.0129363	2.52618	2.26716	0.0185372	2.56712	0.0179885	2.52105	2.04339	0.0238776	2.591	0.021146
Intron_UCSC_common	1.0775	1.07229	0.00451448	1.06822	0.00453728	1.07742	1.0899	0.00703111	1.07045	0.00678018	1.07726	1.09098	0.0082889	1.07579	0.00772587
PromoterFlanking_Hoffman_common	1.59049	1.54735	0.0503196	1.61941	0.0514495	1.59212	1.50389	0.0656307	1.62554	0.0584386	1.58676	1.40705	0.0857177	1.6135	0.0769267
Promoter_UCSC_common	1.91452	1.87096	0.0238138	1.92585	0.0234421	1.91759	1.77088	0.0346772	2.01519	0.0346537	1.91305	1.64999	0.0424748	2.06701	0.0416806
Repressed_Hoffman_common	0.70507	0.71757	0.00498914	0.710767	0.00490711	0.705215	0.730812	0.0068919	0.699823	0.00656133	0.705102	0.754463	0.00856678	0.680779	0.00783536
SuperEnhancer_Hnisz_common	1.72548	1.72201	0.00908952	1.72728	0.00888869	1.72686	1.69643	0.0128876	1.74788	0.0122035	1.72614	1.63301	0.0155826	1.76225	0.0137418
TFBS_ENCODE_common	2.20241	2.1525	0.0122345	2.20928	0.0123872	2.20297	1.96415	0.0178344	2.24491	0.0176753	2.20069	1.76344	0.0228864	2.26586	0.0214739
Transcr_Hoffman_common	1.06741	1.05841	0.00545389	1.053	0.00542573	1.06747	1.07004	0.00735916	1.04608	0.0069638	1.06733	1.07513	0.00812357	1.05642	0.00764431
TSS_Hoffman_common	4.28291	4.1021	0.055811	4.27306	0.0574845	4.28545	3.61575	0.0664044	4.46831	0.0750341	4.28014	3.09855	0.0828586	4.62831	0.094891
UTR_3_UCSC_common	2.91923	2.81088	0.0621529	2.9031	0.0609348	2.91733	2.42072	0.0845396	2.89138	0.0806724	2.91064	2.08431	0.105636	2.8555	0.100456
UTR_5_UCSC_common	3.28612	3.14782	0.10017	3.30601	0.0969559	3.31609	2.70562	0.139535	3.35188	0.135834	3.29084	2.2943	0.151405	3.34777	0.161384
WeakEnhancer_Hoffman_common	1.86076	1.84259	0.0322837	1.87988	0.0318125	1.85596	1.71541	0.0485836	1.88224	0.0474168	1.86176	1.64463	0.0555331	1.95167	0.0565064
GERP.RSsup4_common	7.53888	7.31454	0.11749	7.77141	0.118539	7.5164	6.1345	0.158662	8.30741	0.164953	7.54546	4.87302	0.185177	8.65509	0.211812
synonymous_common	3.04233	2.98556	0.136304	3.11108	0.137134	3.05906	2.8191	0.207628	3.4966	0.202526	3.03075	2.30971	0.2054	3.42055	0.223484
non_synonymous_common	7.73914	7.50118	0.215311	7.93408	0.215666	7.74924	6.28852	0.291433	8.50538	0.310393	7.79204	4.88174	0.291844	9.02205	0.371312
Conserved_Vertebrate_phastCons46way_common	5.57146	5.36413	0.0551195	5.70943	0.0531854	5.56995	4.39104	0.0683079	6.0232	0.0663893	5.57423	3.44305	0.0753429	6.14066	0.0857977
Conserved_Mammal_phastCons46way_common	7.4249	7.15372	0.0763067	7.62066	0.0743341	7.42149	5.81778	0.0969763	8.1244	0.10131	7.43456	4.51078	0.102259	8.33502	0.122217
Conserved_Primate_phastCons46way_common	8.03054	7.73214	0.0710242	8.24195	0.0698635	8.02783	6.34909	0.0935353	8.81951	0.098586	8.05036	4.91226	0.107638	9.09626	0.109544
BivFlnk_common	4.82345	4.72827	0.0697997	4.88344	0.0675528	4.81039	4.21706	0.0936974	5.06155	0.0931841	4.82558	3.67323	0.113534	5.19412	0.122264
Human_Promoter_Villar_common	4.12619	3.93107	0.0589732	4.11618	0.0597916	4.12944	3.49364	0.0691504	4.30112	0.0737555	4.11409	2.94103	0.0827661	4.36068	0.0949411
Human_Enhancer_Villar_common	2.16073	2.12173	0.0296376	2.16513	0.0303054	2.16417	1.99196	0.0436613	2.24618	0.0417334	2.16364	1.87973	0.0542065	2.37291	0.0531735
Ancient_Sequence_Age_Human_Promoter_common	10.2677	9.73331	0.151402	10.3041	0.156879	10.2732	8.20652	0.200978	10.9347	0.204301	10.2436	6.37769	0.249011	11.0165	0.262434
Ancient_Sequence_Age_Human_Enhancer_common	7.83737	7.50188	0.150097	7.87215	0.150523	7.83257	6.20178	0.208835	8.24426	0.208283	7.86009	5.10333	0.239047	8.59444	0.268886
Human_Promoter_Villar_ExAC_common	7.75472	7.15741	0.196358	7.55767	0.195211	7.75774	6.16153	0.273608	7.62852	0.276229	7.72075	5.18851	0.358872	8.12062	0.394571

## Sheet: S5
Table S5: Results of the simulations using an interactive effect between the coding and conserved annotations. We report true and estimated heritability functional enrichments obtained with SuSiE and with S-LDSC without and with the interaction modeled (S-LDSC and S-LDSC+interaction, respectively).
h2	annotation	Truth	S-LDSC	S-LDSC s.e.	S-LDSC+interaction	S-LDSC+interaction s.e.	SuSiE-noprior	SuSiE-noprior s.e.	SuSiE-prior	SuSiE-prior s.e.
0.5	coding	5.45648	5.22724	0.205221	5.42115	0.205178	5.22879	0.0694352	5.61204	0.0683774
0.5	conserved	6.92404	6.87574	0.215889	7.24692	0.224803	6.66981	0.053554	7.2124	0.052716
0.5	coding&conserved	14.5807	9.10545	0.307404	15.4225	0.875222	13.8709	0.206077	14.9	0.200645
0.1	coding	5.42	4.78895	0.154335	5.16798	0.164402	4.34824	0.0988084	6.35087	0.10432
0.1	conserved	6.92107	6.3819	0.162424	6.96902	0.167255	5.44547	0.0686632	8.15286	0.0749543
0.1	coding&conserved	14.4971	8.35326	0.204815	14.6921	0.54534	11.0194	0.286218	16.0145	0.300343
0.05	coding	5.46103	4.80476	0.162252	5.18223	0.169006	3.51369	0.112787	6.68027	0.13205
0.05	conserved	6.91813	6.42978	0.17535	7.01523	0.174912	4.23258	0.0784088	8.62287	0.0922753
0.05	coding&conserved	14.5914	8.40339	0.214218	14.4124	0.499515	8.4475	0.313571	16.0223	0.36256

## Sheet: S6
Table S6: Estimates of heritability enrichment estimated across 15 UK Biobank traits with S-LDSC, SuSiE-noprior, and SuSiE-prior. We report heritability functional enrichments for 40 representative functional annotations of the baseline-LD model. S-LDSC values were averaged across the 15 traits.
	S-LDSC	SuSiE-noprior	SuSiE-prior
Coding_UCSC_common	5.95682	4.23747	7.5161
Conserved_LindbladToh_common	8.55107	3.4666	8.77608
CTCF_Hoffman_common	1.00478	1.27591	1.49234
DGF_ENCODE_common	2.96738	1.8955	2.75659
DHS_peaks_Trynka_common	3.04106	1.94173	3.17293
DHS_Trynka_common	2.46271	1.75403	2.71749
Enhancer_Andersson_common	5.38324	3.28484	6.67308
Enhancer_Hoffman_common	3.20153	2.75726	4.12377
FetalDHS_Trynka_common	3.17823	2.16079	3.65019
H3K27ac_Hnisz_common	1.76325	1.62919	1.8137
H3K27ac_PGC2_common	2.22224	1.8119	2.25951
H3K4me1_peaks_Trynka_common	2.27816	1.83781	2.46646
H3K4me1_Trynka_common	1.88147	1.53084	1.81887
H3K4me3_peaks_Trynka_common	2.97574	2.4645	4.28117
H3K4me3_Trynka_common	2.91616	2.1008	3.10906
H3K9ac_peaks_Trynka_common	3.03093	2.56641	4.26939
H3K9ac_Trynka_common	3.15767	2.28386	3.32766
Intron_UCSC_common	1.16737	1.27022	1.21142
PromoterFlanking_Hoffman_common	2.12588	1.75844	2.48248
Promoter_UCSC_common	2.75137	2.27818	3.55018
Repressed_Hoffman_common	0.609123	0.604821	0.487815
SuperEnhancer_Hnisz_common	2.23999	2.20625	2.4238
TFBS_ENCODE_common	2.98921	2.02568	2.94024
Transcr_Hoffman_common	1.1104	1.26533	1.17056
TSS_Hoffman_common	6.2444	3.94569	7.44439
UTR_3_UCSC_common	3.23527	2.53293	3.8004
UTR_5_UCSC_common	3.2392	3.19463	5.42453
WeakEnhancer_Hoffman_common	2.88732	2.33236	3.04941
GERP.RSsup4_common	8.95827	4.31106	9.9596
synonymous_common	5.06238	2.48552	5.74186
non_synonymous_common	10.4152	9.6545	16.3198
Conserved_Vertebrate_phastCons46way_common	6.17491	2.85622	7.16894
Conserved_Mammal_phastCons46way_common	8.38694	3.58464	9.54026
Conserved_Primate_phastCons46way_common	9.238	3.61771	10.0848
BivFlnk_common	5.95415	3.3933	6.23356
Human_Promoter_Villar_common	7.10578	3.97569	7.40378
Human_Enhancer_Villar_common	3.01334	2.79033	3.77642
Ancient_Sequence_Age_Human_Promoter_common	16.0703	6.09087	14.8216
Ancient_Sequence_Age_Human_Enhancer_common	10.4704	5.02835	9.84661
Human_Promoter_Villar_ExAC_common	12.3858	4.68541	12.1526

## Sheet: S7
Table S7: Estimates of heritability enrichment across 15 UK Biobank traits estimated with S-LDSC, SuSiE-noprior, and SuSiE-prior. We report heritability functional enrichments for 5 LD score bins. S-LDSC values were averaged across the 15 traits.
	S-LDSC	SuSiE-noprior	SuSiE-prior
LD bin 1 (lowest value)	1.3197	1.26701	1.32352
LD bin 2	1.15917	1.15992	1.15018
LD bin 3	0.964386	1.03391	1.02028
LD bin 4	0.90471	0.906269	0.897928
LD bin 5 (highest value)	0.652033	0.695752	0.664472

## Sheet: S8
Table S8: Mean squared error (MSE) of decision trees for common and low-frequency variants. We report MSEs computed using a LEOCO procedure on common variants and low-frequency variants. For interpretability, we multiplied b2 by 10**7 and subtracted the MSE obtained by using the linear model (positive values mean that the decision tree does not provide a better fit than the linear model).
Common variants
		Minimum number of SNPs per leaf
		100K	50K	25K	10K	5K
Tree depth	3	148.95	151.483	145.521	152.741	147.598
	4	144.32	143.999	133.332	140.578	136.03
	5	138.809	139.88	126.718	132.64	130.911
	6	137.922	137.638	121.896	126.386	129.209
	7	137.625	137.075	120.013	123.87	131.971
	8	137.35	136.844	118.876	124.817	134.766
	9	137.19	136.992	118.644	124.238	133.591
	10	137.19	136.889	118.184	123.302	135.268
Low-frequency variants
		Minimum number of SNPs per leaf
		100K	50K	25K	10K	5K
Tree depth	3	53.6531	49.4216	33.0714	24.8257	31.1054
	4	46.949	42.1461	26.4357	19.9469	26.022
	5	45.439	39.6639	21.5931	14.7672	22.4008
	6	43.8684	38.0329	20.2319	12.8288	22.0194
	7	43.394	36.8645	19.3101	11.6632	20.8053
	8	43.0723	36.7828	18.6726	11.965	21.1096
	9	43.0366	36.6235	18.4309	12.0762	23.161
	10	43.0065	36.5453	18.2588	12.6925	24.4076

## Sheet: S9
Table S9: Heritability explained by each leaf of the common variant tree. We report the common variant h2 enrichment of each leaf estimated by S-LDSC and expected by S-LDSC with the baseline-LD model using 79 independent European GWAS not correlated with the 15 UK Biobank traits.
Leaf #	prop_snps	prop_h2	prop_h2_se	enrichment	enrichment_se	prop_h2expected	prop_h2expected_se	diff_h2_P
1	0.00521425	0.0903878	0.00516684	17.3347	0.990907	0.0569843	0.00281806	1.38149e-08
2	0.00846245	0.0575187	0.00557414	6.79693	0.658691	0.0796886	0.005343	0.00408839
3	0.00559237	0.0150001	0.00392663	2.68225	0.702141	0.0374058	0.00297489	5.4113e-06
4	0.0147351	0.0485106	0.00579066	3.29219	0.392986	0.067128	0.0063898	0.0308529
5	0.105353	0.153849	0.0175529	1.46032	0.166611	0.171954	0.0183924	0.476392
6	0.00914235	0.0218397	0.00368595	2.38885	0.403173	0.0357412	0.0031872	0.00433277
7	0.851501	0.583924	0.0209993	0.685759	0.0246615	0.537397	0.0218222	0.124461

## Sheet: S10
Table S10: Heritability explained by each leaf of the low-frequency variant tree. We report the low-frequency variant h2 enrichment of each leaf estimated by S-LDSC and expected by S-LDSC with the baseline-LF model using 23 independent UK Biobank traits with sufficient power to investigate low-frequency variant architecture.
Leaf #	prop_snps	prop_h2	prop_h2_se	enrichment	enrichment_se	prop_h2expected	prop_h2expected_se	diff_h2_P
1	0.00239382	0.100087	0.00723178	0.100087	0.00723178	0.0936324	0.00658158	0.509223
2	0.0010107	0.0261258	0.0039042	0.0261258	0.0039042	0.0384801	0.00279513	0.0100841
3	0.00185573	0.0739452	0.00560272	0.0739452	0.00560272	0.0691322	0.00514588	0.526946
4	0.0016107	0.0625777	0.00562805	0.0625777	0.00562805	0.0324947	0.00226822	7.13327e-07
5	0.0269184	0.201629	0.0238028	0.201629	0.0238028	0.261157	0.0210663	0.0610994
6	0.0970936	0.0932203	0.0104525	0.0932203	0.0104525	0.129196	0.0122618	0.0255618
7	0.869117	0.414875	0.0242931	0.414875	0.0242931	0.352027	0.0262059	0.0786134

[truncated: 10 more sheets: S11, S12 - MLP, S12 - XGBoost, S12 - RF, S13, S14, S15, S16, S17, S4_removed]
